# Supplementary material for: Seed bank dynamics and quality in the seagrass Halophila ovalis along estuarine salinity gradients—a case in the Swan-Canning Estuary
Source: Frontiers journal article supplement (doi:10.3389/fmars.2022.1025615), 2022-11-22
Supplement: Data_Sheet_1.xlsx [file Data_Sheet_1.xlsx]

## Sheet: table S1
		Table S1 Swan-Canning Estuary salinity (psu) (in situ) monthly sample numbers(n), minimum, maximum and median values for 2018-2019.
			Jun	Jul	Aug	Sep	Oct	Nov	Dec	Jan	Feb	Mar	Apr	May
		Salinity Lower Swan-Canning Estuary (Surface)
		n	16	20	16	16	20	16	11	20	16	16	20	16
		min	20.99	5.13	2.04	2.27	12.12	19.85	25.42	31.34	33.83	34.43	36.18	34.89
		max	35.04	30.06	6.92	16.31	29.2	30.77	32.05	35.38	36.19	36.57	37.07	36.73
		median	3.47	20.31	3.92	7.33	22.72	27.13	30.13	33.84	35.64	36.15	36.72	36.31
		Salinity Middle Swan-Canning Estuary (Surface)
		n	16	20	15	16	20	16	12	20	16	16	20	16
		min	7.2	3.89	2.19	2.77	3.41	4.06	6.72	14.89	20.04	23.97	25.82	27.05
		max	29.44	21.87	3.48	4.68	9.89	16.51	20.75	29.36	31.7	33.52	34.98	33.9
		median	13.44	5.46	3.31	3.25	4.76	7.76	13.35	21.82	26.17	28.99	30.58	30.78
		Salinity upper Swan-Canning Estuary (Surface)
		n	16	20	12	16	20	16	12	20	16	16	20	16
		min	5.76	4.23	3.32	2.97	3.34	4.1	4.44	4.95	6.43	11.19	16.96	17.99
		max	18.57	11.65	3.69	3.84	4.98	4.82	7.42	17.28	21.02	25.2	27.33	27.76
		median	7.36	5.13	3.45	3.59	4.24	4.65	4.92	9.84	15.26	20.2	23.63	24.71
		Data from Department of Water and Environmental Regulation 2019

## Sheet: table S2
		Table S2 Data analysis of the statistical variances in the seasonal seed density at RCK, FB, PPT during 2019-2020
		Variable		df	Sum Sq	Mean Sq	F value	p
		Two-way ANOVA
		Model		11	106524	9684.05	14.02	<0.001
		Month		3	5463.55	1821.18	2.64	0.049
		Site		2	64535	32267.5	46.72	<0.001
		Month × Site		6	36525.9	6087.65	8.81	<0.001
		One-way ANOVA
		Site
		RCK		3	28531.7	9510.56	7.35	<0.001
		FB		3	13152.5	4384.18	5.97	<0.001
		PPT		3	305.25	101.75	2.36	0.072
		Month
		September		2	38950	19475	14.49	<0.001
		November		2	32544	16272	37.78	<0.001
		January		2	21490.7	10745.3	19.11	<0.001
		March		2	8076.23	4038.12	9.48	<0.001

## Sheet: Reference
Reference
	Department of Water and Environmental Regulation (2019). Swan canning estuarine data report, June 2018 to may 2019 (Western Australia:Department of Water and Environmental Regulation for the Department of Biodiversity, Conservation and Attractions).
