# Supplementary material for: Seed bank dynamics and quality in the seagrass Halophila ovalis along estuarine salinity gradients—a case in the Swan-Canning Estuary
Source: Frontiers journal article supplement (doi:10.3389/fmars.2022.1025615), 2022-11-22
Supplement: Image_1.pdf [file Image_1.pdf]

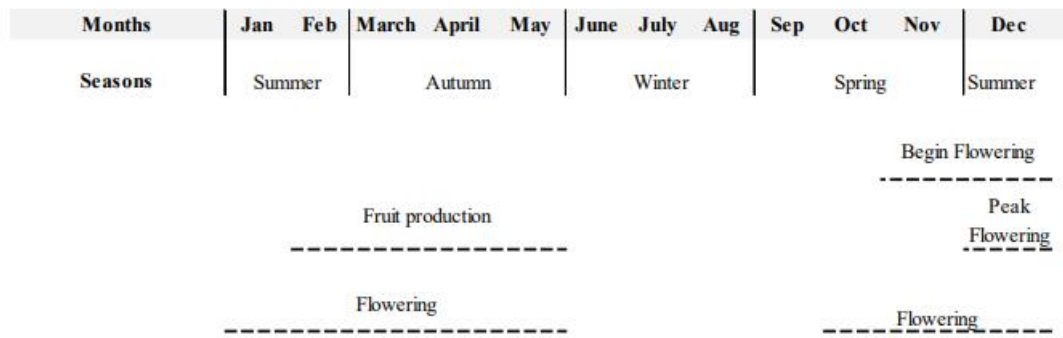

Figure S1 Annual cycle of sexual reproduction of *H. ovalis* in Swan-Canning estuary (Kilminster and Forbes 2014)

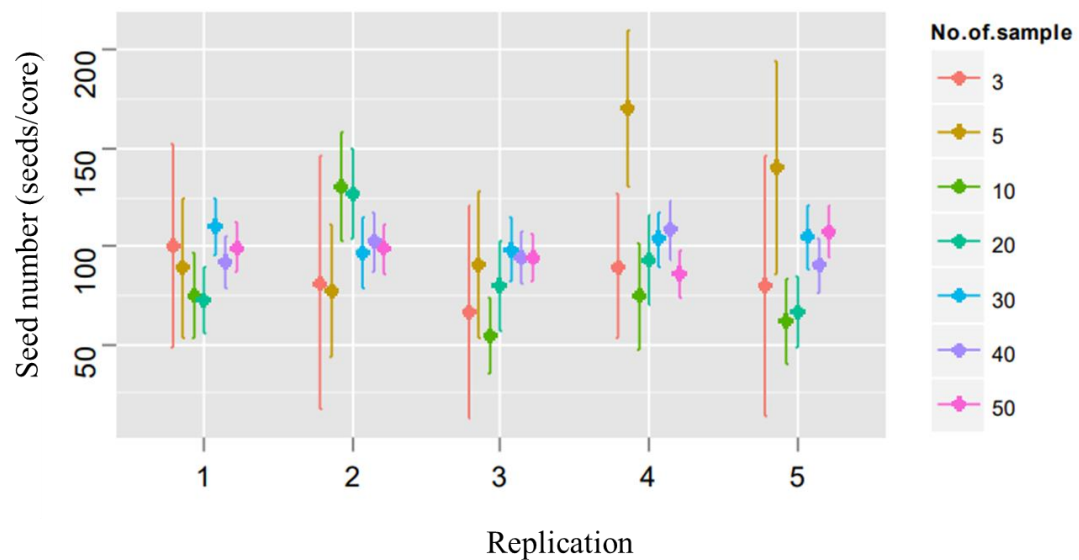

Figure S2 Standard error (SE) of several samples generated randomly from data in Freshwater Bay (FB). Number of samples was from 3 to 50, while the data in FB in May consisted of 60 sample cores. Five-time replication was conducted at each number of samples.

#### Reference

Kilminster and Forbes (2014). Seagrass as an indicator of estuary condition in the Swan-Canning estuary, Water Science Technical Series, report no. 62, Department of Water, Western Australia
